# Supplementary material for: Exploring the Genetic Resistance to Gastrointestinal Nematodes Infection in Goat Using RNA-Sequencing
Source: MDPI journal article supplement (doi:10.3390/ijms18040751), 2017-04-01

## Supplementary figure 1: Fast QC (quality control) data

| Goat ID | Basic statistics   |                         | Goat ID | Basic statistics   |                         |
|---------|--------------------|-------------------------|---------|--------------------|-------------------------|
| X18     | Measure            | Value                   | A101    | Measure            | Value                   |
|         | Filename           | 18_1.paired.fq          |         | Filename           | A101_1.paired.fq        |
|         | File type          | Conventional base calls |         | File type          | Conventional base calls |
|         | Encoding           | Sanger / Illumina 1.9   |         | Encoding           | Sanger / Illumina 1.9   |
|         | Total Sequences    | 18344612                |         | Total Sequences    | 22740578                |
|         | Filtered Sequences | 0                       |         | Filtered Sequences | 0                       |
|         | Sequence length    | 50-130                  |         | Sequence length    | 50-105                  |
|         | %GC                | 52                      |         | %GC                | 55                      |
| A002    | Measure            | Value                   | X066    | Measure            | Value                   |
|         | Filename           | A002_1.paired.fq        |         | Filename           | 066_1.paired.fq         |
|         | File type          | Conventional base calls |         | File type          | Conventional base calls |
|         | Encoding           | Sanger / Illumina 1.9   |         | Encoding           | Sanger / Illumina 1.9   |
|         | Total Sequences    | 20611561                |         | Total Sequences    | 22153023                |
|         | Filtered Sequences | 0                       |         | Filtered Sequences | 0                       |
|         | Sequence length    | 50-130                  |         | Sequence length    | 50-105                  |
|         | %GC                | 51                      |         | %GC                | 52                      |
| H095    | Measure            | Value                   | X043    | Measure            | Value                   |
|         | Filename           | H096_1.paired.fq        |         | Filename           | 043_1.paired.fq         |
|         | File type          | Conventional base calls |         | File type          | Conventional base calls |
|         | Encoding           | Sanger / Illumina 1.9   |         | Encoding           | Sanger / Illumina 1.9   |
|         | Total Sequences    | 19275680                |         | Total Sequences    | 25440163                |
|         | Filtered Sequences | 0                       |         | Filtered Sequences | 0                       |
|         | Sequence length    | 50-130                  |         | Sequence length    | 50-105                  |
|         | %GC                | 51                      |         | %GC                | 50                      |
| X248    | Measure            | Value                   | B15     | Measure            | Value                   |
|         | Filename           | 248_1.paired.fq         |         | Filename           | B15_1.paired.fq         |
|         | File type          | Conventional base calls |         | File type          | Conventional base calls |
|         | Encoding           | Sanger / Illumina 1.9   |         | Encoding           | Sanger / Illumina 1.9   |
|         | Total Sequences    | 22221239                |         | Total Sequences    | 25789160                |
|         | Filtered Sequences | 0                       |         | Filtered Sequences | 0                       |
|         | Sequence length    | 50-130                  |         | Sequence length    | 50-105                  |
|         | %GC                | 51                      |         | %GC                | 50                      |

Goat ID  
**X18**

**Per base sequence quality**

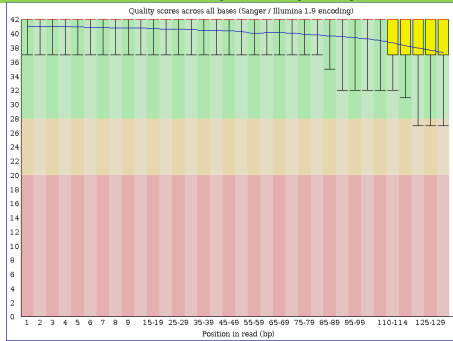

Goat ID  
**A101**

**Per base sequence quality**

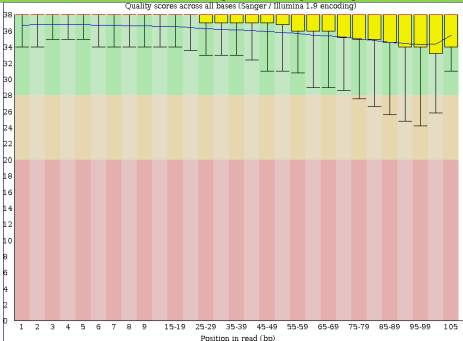

**A002**

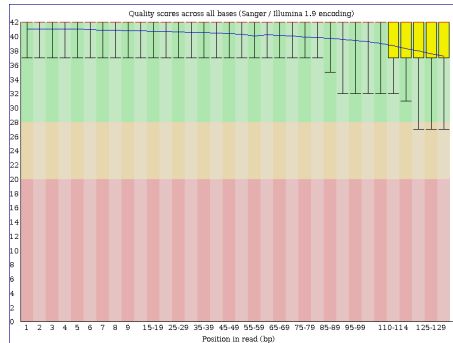

**X066**

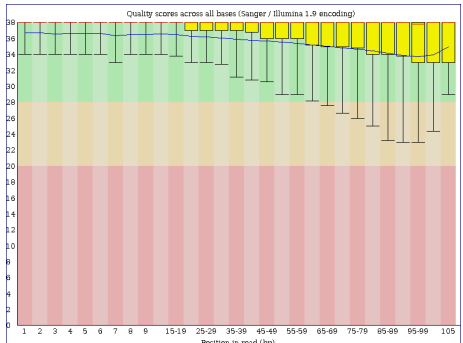

**H095**

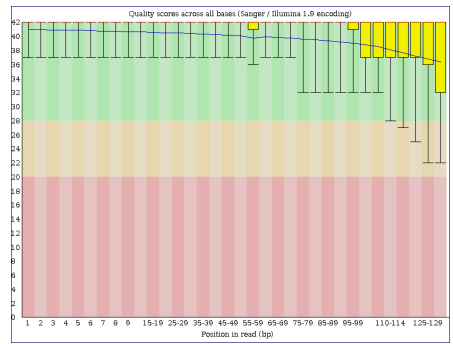

**X043**

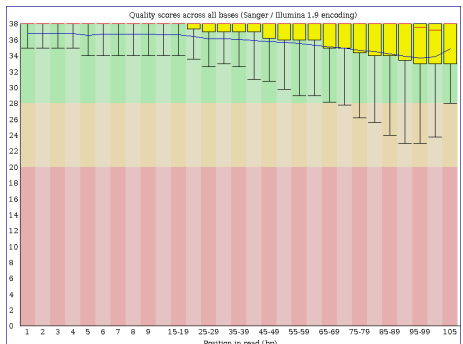

**X248**

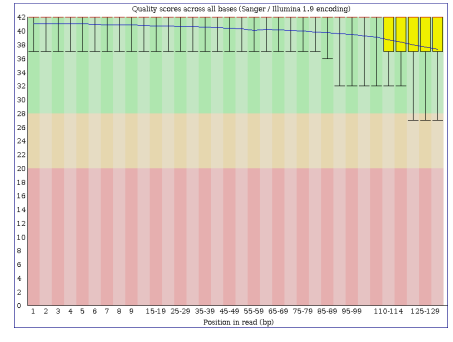

**B15**

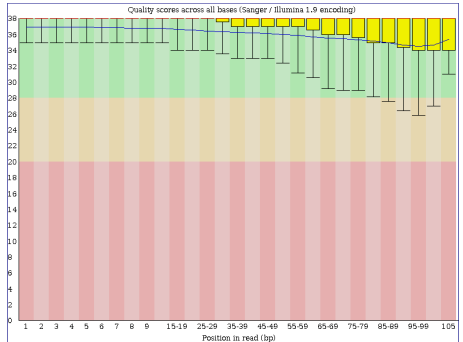

Goat ID **X18** Per sequence quality scores

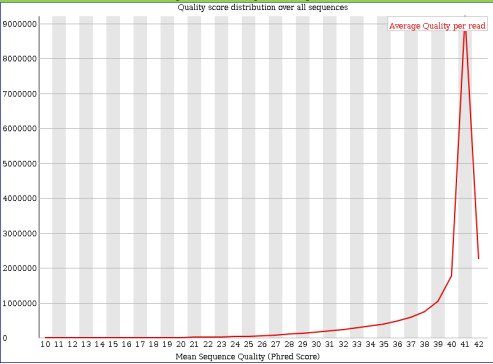

Goat ID **A101** Per sequence quality scores

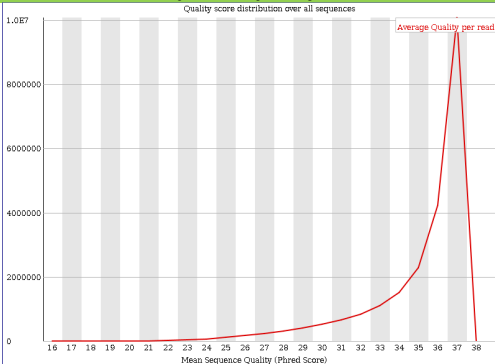

**A002**

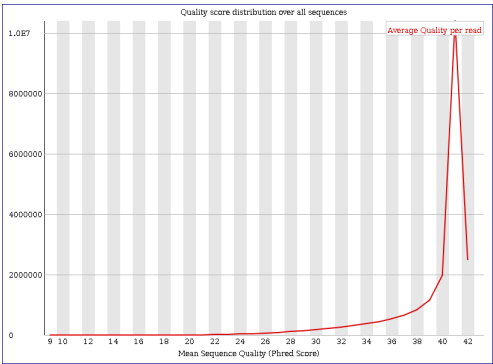

**X066**

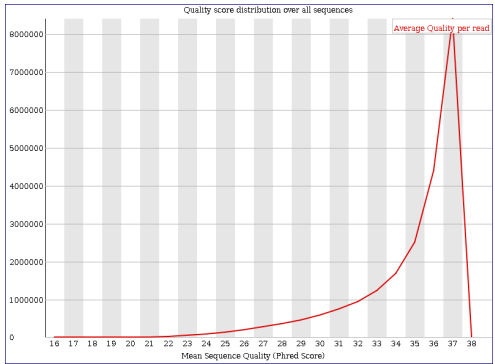

**H095**

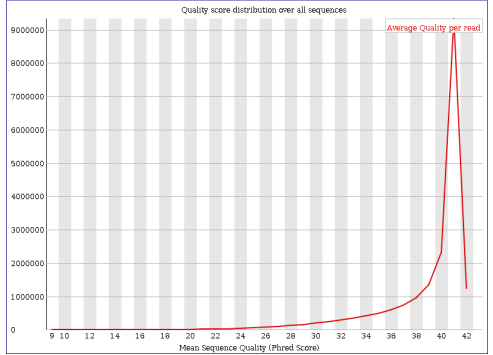

**X043**

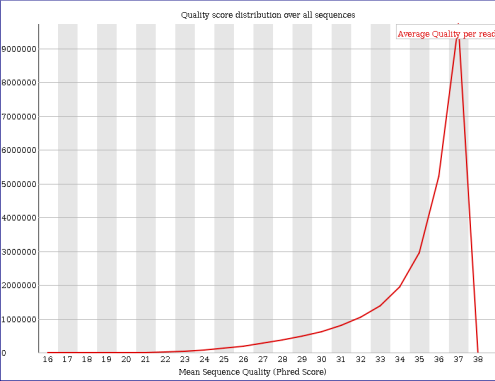

**X248**

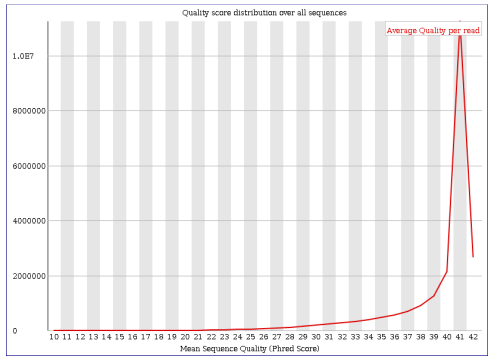

**B15**

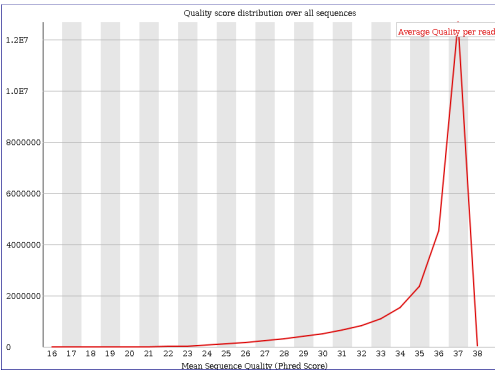

Goat ID  
**X18**

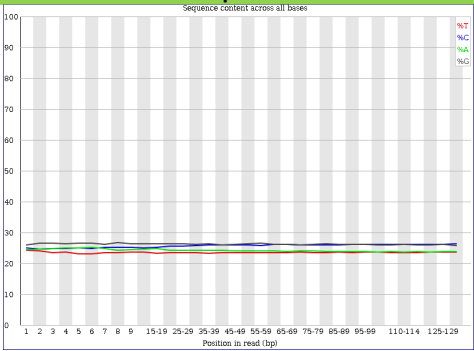

Goat ID  
**A101**

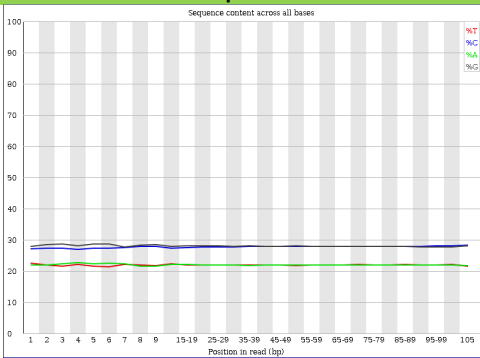

**A002**

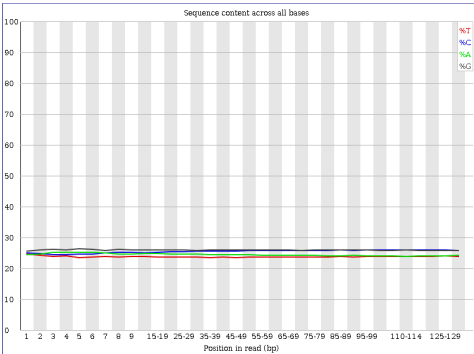

**X066**

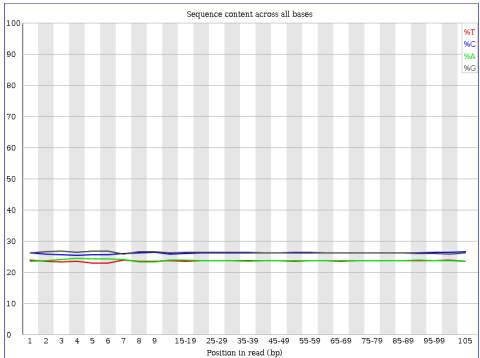

**H095**

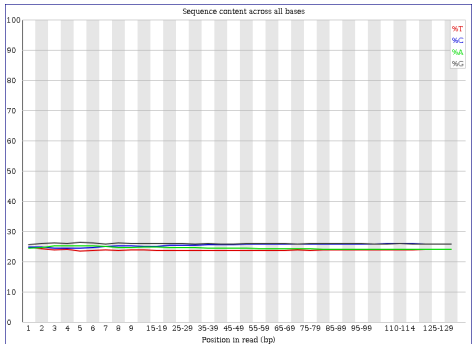

**X043**

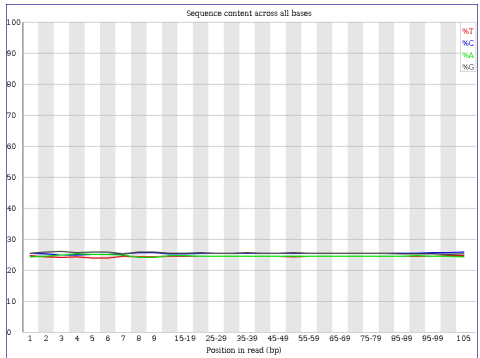

**X248**

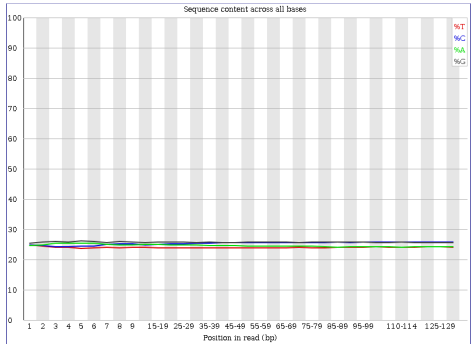

**B15**

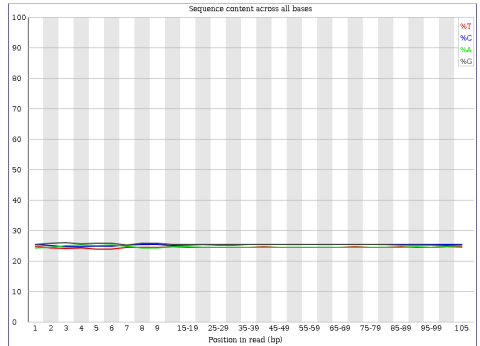

Goat ID  
**X18**

**Per base GC content**

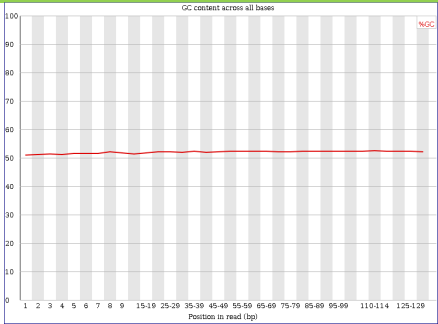

Goat ID  
**A101**

**Per base GC content**

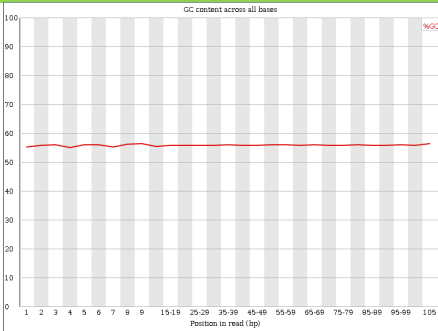

**A002**

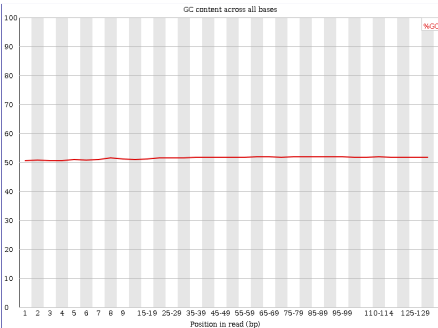

**X066**

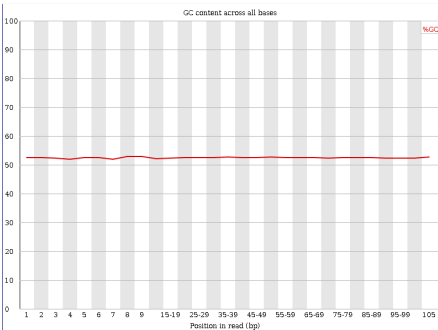

**H095**

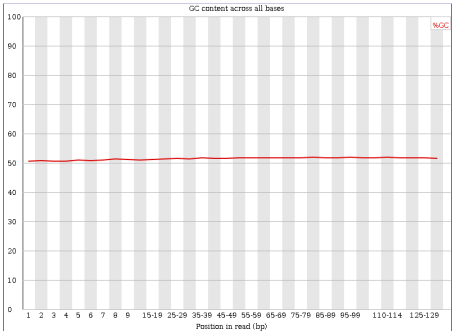

**X043**

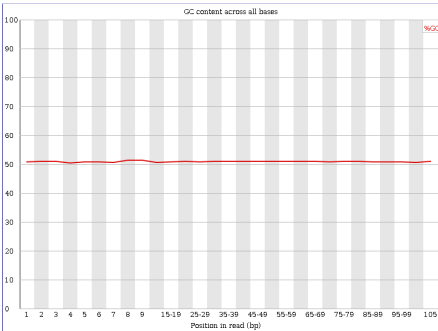

**X248**

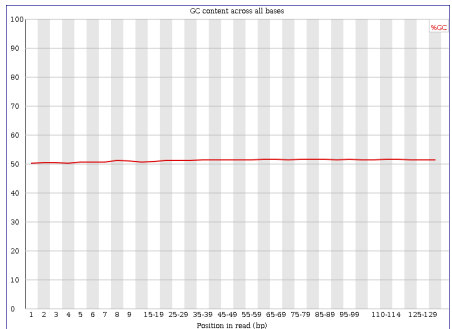

**B15**

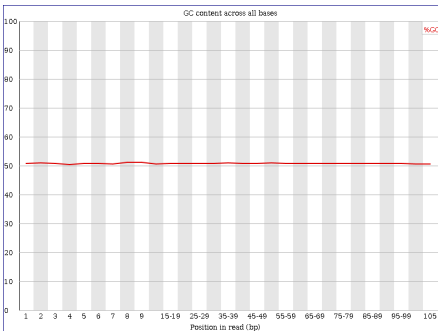

Supplement: s1 [file s1]
