# Supplementary material for: Exploring the Genetic Resistance to Gastrointestinal Nematodes Infection in Goat Using RNA-Sequencing
Source: MDPI journal article supplement (doi:10.3390/ijms18040751), 2017-04-01
Supplement: s1 [file s1]

**Supplementary table 3: List of target genes primer sequences**

| Genes          | Primers | Sequences                     | Base | GC%   | Product length | n.mol/OD | MW     |
|----------------|---------|-------------------------------|------|-------|----------------|----------|--------|
| C3             | Forward | 5' CACCATGCAGCCCACCT 3'       | 17   | 64.71 | 274            | 6.5      | 5060.3 |
|                | Reverse | 5' CTTGATGGTGACGGTGCTCA 3'    | 20   | 56.00 |                | 5.4      | 6164.1 |
| ITGA4          | Forward | 5' CAGTTGGTGCTTTTCGGTCTG 3'   | 21   | 52.38 | 247            | 5.1      | 6109.0 |
|                | Reverse | 5' GACGGAGACTCTGCCTTTTCG 3'   | 20   | 60.00 |                | 5.4      | 6466.3 |
| BCL2           | Forward | 5' GGATGACCGAGTACCTGAACC 3'   | 21   | 57.14 | 269            | 5.1      | 6182.1 |
|                | Reverse | 5' CAGCAGTGGCAATGTGGACT 3'    | 20   | 56.00 |                | 5.3      | 6182.1 |
| ATP7A          | Forward | 5' AAGATGAAGGTGGAAGGGATGAC 3' | 23   | 47.83 | 181            | 4.6      | 7250.8 |
|                | Reverse | 5' AGCCCACAACCTCAATCTGCTT 3'  | 22   | 45.45 |                | 5.0      | 6614.4 |
| ERAP1          | Forward | 5' ACTTTCGCTTTCACTTTTGGTCC 3' | 23   | 43.48 | 274            | 4.8      | 6922.6 |
|                | Reverse | 5' GCTGGGATGATGTGCTCTGG 3'    | 20   | 50.00 |                | 5.3      | 6220.1 |
| ST6GAL1        | Forward | 5' ACCTTTCAAACCTCAGCTCCG 3'   | 21   | 52.38 | 275            | 5.2      | 6286.1 |
|                | Reverse | 5' GAAAGATGAGCACACAGCAGC 3'   | 21   | 52.38 |                | 5.1      | 6482.3 |
| LST1           | Forward | 5' ATGTCTGAGGCGGCAACAC 3'     | 19   | 57.89 | 181            | 5.7      | 5837.8 |
|                | Reverse | 5' CCAGAACGACCACAAGCAGA 3'    | 20   | 56.00 |                | 5.4      | 6098.0 |
| IFI44L         | Forward | 5' TAGTCCATAAGTGTGACGGAGC 3'  | 22   | 50.00 | 216            | 4.9      | 6799.5 |
|                | Reverse | 5' CCTTGACAACGGCACCTATTCT 3'  | 22   | 50.00 |                | 5.0      | 6630.4 |
| IL1R2          | Forward | 5' AACAAACACCCGCATAGAGGAT 3'  | 21   | 47.62 | 294            | 5.1      | 6417.2 |
|                | Reverse | 5' GCGTTTATACCGTCTGTGCATC 3'  | 22   | 50.00 |                | 4.9      | 6692.4 |
| F12            | Forward | 5' GCCCCAGTTTTTCCGGTTCT 3'    | 20   | 55.00 | 255            | 5.5      | 6026.0 |
|                | Reverse | 5' CAGCTCAGTTGGTCGCCTT 3'     | 19   | 57.89 |                | 5.7      | 5770.8 |
| CCL27          | Forward | 5' TGTGGCGGGATGATTGTGAA 3'    | 20   | 50.00 | 273            | 5.3      | 6098.0 |
|                | Reverse | 5' CCGTTTTCCATGGGCTCCTA 3'    | 20   | 56.00 |                | 5.5      | 6268.2 |
| IFI6           | Forward | 5' TCTCTGCTCTCCTCCAAGTTCT 3'  | 22   | 50.00 | 180            | 5.0      | 6630.4 |
|                | Reverse | 5' GTAGCAGGTAGCACAGGAACAG 3'  | 22   | 54.55 |                | 4.8      | 6563.3 |
| $\beta$ -actin | Forward | 5' GCAAGGACCTTTACGCCAAC 3'    | 20   | 55.00 | 116            | 5.4      | 6204.1 |
|                | Reverse | 5' CTTGATCTTCATCGTGCTGGG 3'   | 21   | 52.40 |                | 5.1      | 6022.0 |
